# Supplementary material
Source: HighWire-hosted journal article supplement (https://jnm.snmjournals.org/highwire/filestream/94898/field_highwire_adjunct_files/0/168153_Supplemental_Data.pdf)
Supplement: 168153_Supplemental_Data.pdf [file 168153_Supplemental_Data.pdf]

## MATERIALS AND METHODS

### Conjugation and labeling of AMG 110 and Mec14.

AMG 110 and Mec14 were first purified with water for injections using a Vivaspin-2 10 kDa filter (GE Healthcare). Conjugation was performed by allowing BiTE<sup>®</sup> antibody constructs to react with a 6.7-fold molar excess of *N*-succinyl-desferrioxamine-B-tetrafluorophenol (N-sucDf-TFP, ABX), as described earlier (1). Conjugated BiTE<sup>®</sup> was radiolabeled on the same day with <sup>89</sup>Zr-oxalate (PerkinElmer). Free <sup>89</sup>Zr was removed by using a Vivaspin-2 10 kDa filter.

For labeling with respectively IRDye 800CW and 680RD, purified AMG 110 and Mec14 reacted with a 3-fold molar excess of IRDye as described earlier (2). Unreacted dye was removed using PD10 desalting columns (Fisher Scientific).

### Quality control of <sup>89</sup>Zr-AMG 110 and <sup>89</sup>Zr-Mec14.

Aggregation, fragmentation and concentration of <sup>89</sup>Zr-AMG 110, 800CW-AMG 110, <sup>89</sup>Zr-Mec14 and 680RD-Mec14 were assessed using size exclusion high performance liquid chromatography (SE-HPLC). The Waters SE-HPLC system was equipped with a dual wavelength absorbance detector, an in line radioactivity detector and a size exclusion column (Superdex 75 10/300 GL column; GE Healthcare). PBS was used as mobile phase at a flow of 0.7 ml/min. Radiochemical purity (RCP) of <sup>89</sup>Zr-AMG 110 and <sup>89</sup>Zr-Mec14 was determined using trichloroacetic acid precipitation (3).

The *in vitro* binding characteristics (immunoreactive fraction; IRF) of the radiolabeled BiTE<sup>®</sup> antibody constructs were determined in a cell binding assay as described by Lindmo et al. (4). In short, two series of HT-29 cell dilutions were incubated in duplicate with 15 ng/mL <sup>89</sup>Zr-AMG 110 for 2 h at 4°C while shaking. To

one of the cell series a 1000 fold excess of cold AMG 110 was added to block EpCAM specific binding and set the reference used to correct for non-specific binding. After 2 h incubation, cells were washed twice with PBS containing 1% human serum albumin (HSA). Radioactivity of standards and cell pellets were measured with a calibrated well-type  $\gamma$ -counter (LKB 1282; CompuGamma). The IRF was determined for each separate experiment by extrapolating to conditions representing infinite antigen excess, corrected for non-specific binding.

### **In vitro evaluation of $^{89}\text{Zr}$ -AMG 110.**

Internalization of  $^{89}\text{Zr}$ -AMG 110 was determined by incubating  $10^6$  HT-29 cells with 50 ng  $^{89}\text{Zr}$ -AMG 110 for 1 h at 4°C. Subsequently, unbound  $^{89}\text{Zr}$ -AMG 110 was removed by rinsing with PBS containing 1% HSA. Remaining activity, defined as initial cell associated radioactivity, was measured in a calibrated well-type  $\gamma$ -counter and set to 100%. Next cells were resuspended in culture medium (RPMI + 10% FCS, including T = 0) and incubated 1, 2 or 4 h at 4°C or 37°C. Thereafter, medium was removed and cell pellet activity, defined as membrane bound + internalized, was measured in a calibrated well-type  $\gamma$ -counter. Finally, cells were stripped using urea buffer (4 M urea, 2 M glycine, pH 2.0) (5) and washed twice with urea buffer. Radioactivity in the stripped pellet, representing the internalized radioactivity, was measured in a calibrated well-type  $\gamma$ -counter. Internalization was determined by the following formula: (internalized radioactivity/initial cell associated radioactivity) x 100%.

### **Flow cytometry.**

To determine EpCAM expression by the cell lines, flow cytometry was performed with a BD Accuri™ C6 flow cytometer (BD Biosciences). HT-29, FaDu or HL-60 cells were incubated for 1 h at 4 °C, with 20 µg/mL mouse anti-human EpCAM antibody (Abcam, ab20160) and washed twice using phosphate buffered saline (PBS; 140 mmol/L NaCl, 9 mmol/L Na<sub>2</sub>HPO<sub>4</sub>, 1.3 mmol/L NaH<sub>2</sub>PO<sub>4</sub>; pH = 7.4, UMCG) containing 0.5% FCS and 2 mM ethylenediaminetetraacetic acid. Subsequently, cells were incubated for 1 h at 4°C with (0.01 mg/mL) goat anti-mouse phycoerythrin secondary antibody (Southern Biotech). Cells were finally washed twice and EpCAM expression was assessed. Membrane expression was calculated as mean fluorescent intensity and expressed as percentage of HT-29 signal.

### ***In vivo* fluorescent imaging**

For NIR fluorescence imaging, mice bearing HT-29 xenografts (n = 4) were co-injected with 40 µg 800CW-AMG 110 and 40 µg 680RD-Mec14. Mice undergoing fluorescent imaging were kept on an alfalfa-free diet to minimize autofluorescence. Imaging was performed at 0.5, 1, 3, 6 and 24 h after tracer injection, using the IVIS Spectrum (Caliper Life Sciences) imaging system. Excitation wavelengths were set at 640 nm for 680RD-Mec14 and 745 nm for 800CW-AMG 110. Data were analyzed using Living Image 3.2 software (Caliper Life Sciences). Tumor signal was determined by drawing regions of interest around tumor boundaries for both 680RD-Mec14 and 800CW-AMG 110.

## **RESULTS**

### **Labeling and quality control of $^{89}\text{Zr}$ -AMG 110 and $^{89}\text{Zr}$ -Mec14.**

AMG 110 and Mec14 were successfully conjugated with N-sucDf-TFP (ratio 1:3) and labeled with  $^{89}\text{Zr}$ . The retention time for AMG 110 and Mec14 was approximately 17 min.  $^{89}\text{Zr}$ -N-sucDf-TFP, low-molecular-weight impurities and buffer additives eluted around 25 min on the SE-HPLC (Supplemental Fig 2A). Upon N-sucDf-TFP conjugation and  $^{89}\text{Zr}$  labeling of AMG 110 and Mec14, SE-HPLC did not show aggregation or fragmentation and radiochemical purity was confirmed using trichloroacetic acid precipitation tests (respectively  $96.8 \pm 1.1\%$  and  $96.2\%$ ;  $n = 10$  and  $n = 1$ ).

Conjugation of N-sucDf-TFP to AMG 110 and subsequent labeling with  $^{89}\text{Zr}$  resulted in a mean IRF of  $0.60 \pm 0.03$  for EpCAM (Supplemental Figs. 2B and 2C;  $n = 6$ ). Subsequent to EpCAM binding,  $^{89}\text{Zr}$ -AMG 110 showed minimal internalization by HT-29 cells at  $37^\circ\text{C}$  *in vitro* (Supplemental Fig. 3).

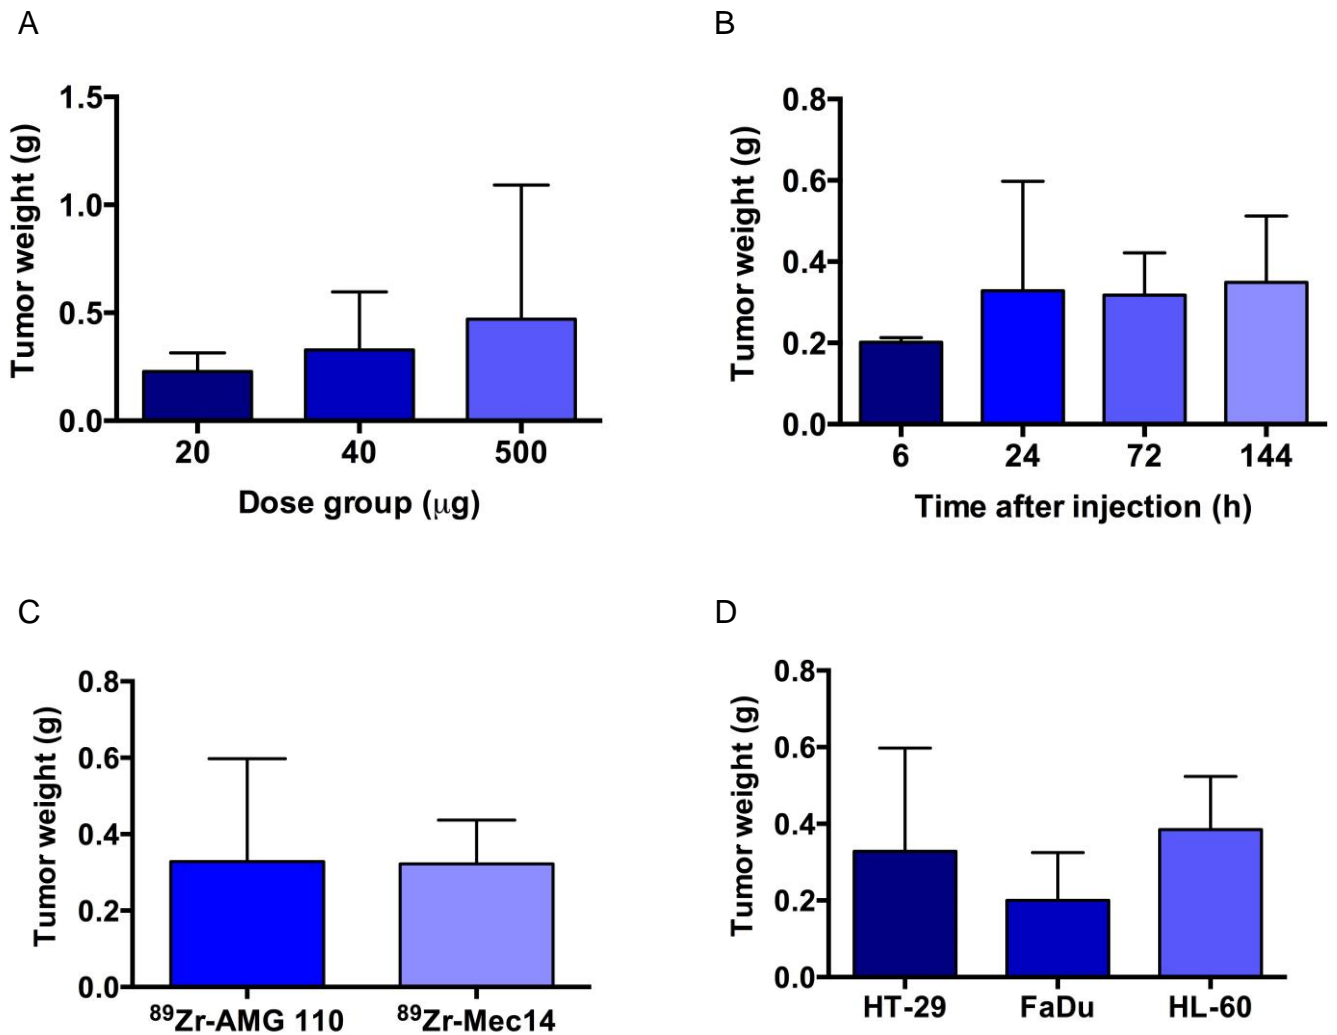

**SUPPLEMENTAL FIGURE 1.** Differences in ex vivo tumor weights between the experiments, as measured after mice were sacrificed. (A) Difference in tumor weights after resection from mice injected with  $^{89}\text{Zr-AMG 110}$  at 20  $\mu\text{g}$  ( $n = 5$ ), 40  $\mu\text{g}$  ( $n = 4$ ) or 500  $\mu\text{g}$  ( $n = 3$ ) dose levels. (B) Difference in tumor weights at 6 ( $n = 3$ ), 24 ( $n = 4$ ), 72 ( $n = 4$ ) and 144 h ( $n = 5$ ) after injection of 40  $\mu\text{g}$   $^{89}\text{Zr-AMG 110}$ . (C) Difference in tumor weights at 24 h after injection of 40  $\mu\text{g}$   $^{89}\text{Zr-AMG 110}$  ( $n = 4$ ) or 40  $\mu\text{g}$   $^{89}\text{Zr-Mec 14}$  ( $n = 6$ ). (D) Difference in tumor weights between HT-29 ( $n = 4$ ), FaDu ( $n = 5$ ) and HL-60 ( $n = 6$ ) tumors at 24 h after injection of 40  $\mu\text{g}$   $^{89}\text{Zr-AMG 110}$ .

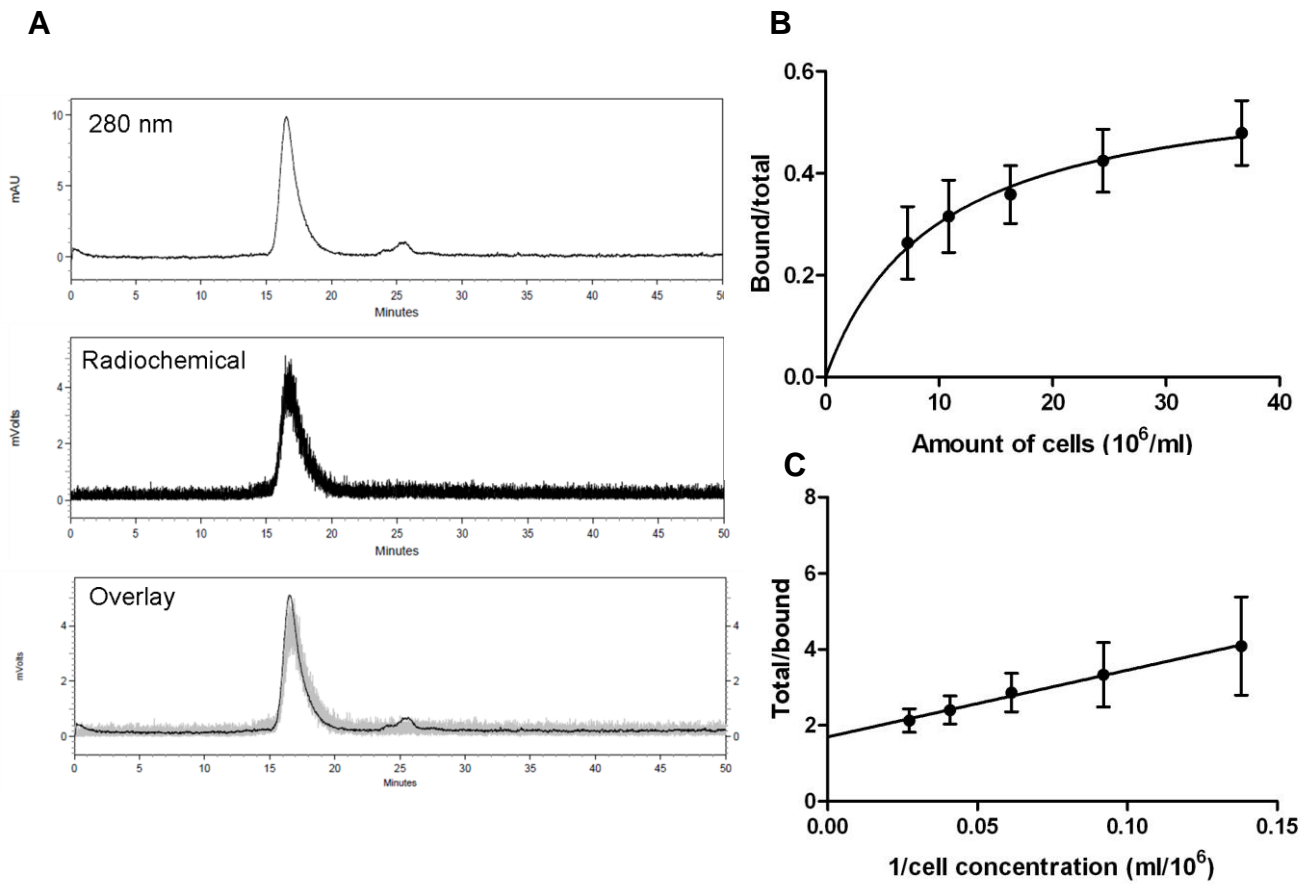

**SUPPLEMENTAL FIGURE 2.** Quality control of  $^{89}\text{Zr}$ -AMG 110 and  $^{89}\text{Zr}$ -Mec 14. Panel A shows a typical SE-HPLC chromatogram of  $^{89}\text{Zr}$ -AMG 110 (upper panel) or  $^{89}\text{Zr}$ -Mec 14 (lower panel), which is an overlay of 280 nm and radiochemical signal. The binding of  $^{89}\text{Zr}$ -AMG 110 to an increasing number of HT-29 cells is shown in panel B. Its reciprocal plot to infinite antigen excess was used to determine immunoreactive fraction. Data is presented as mean  $\pm$  SD.

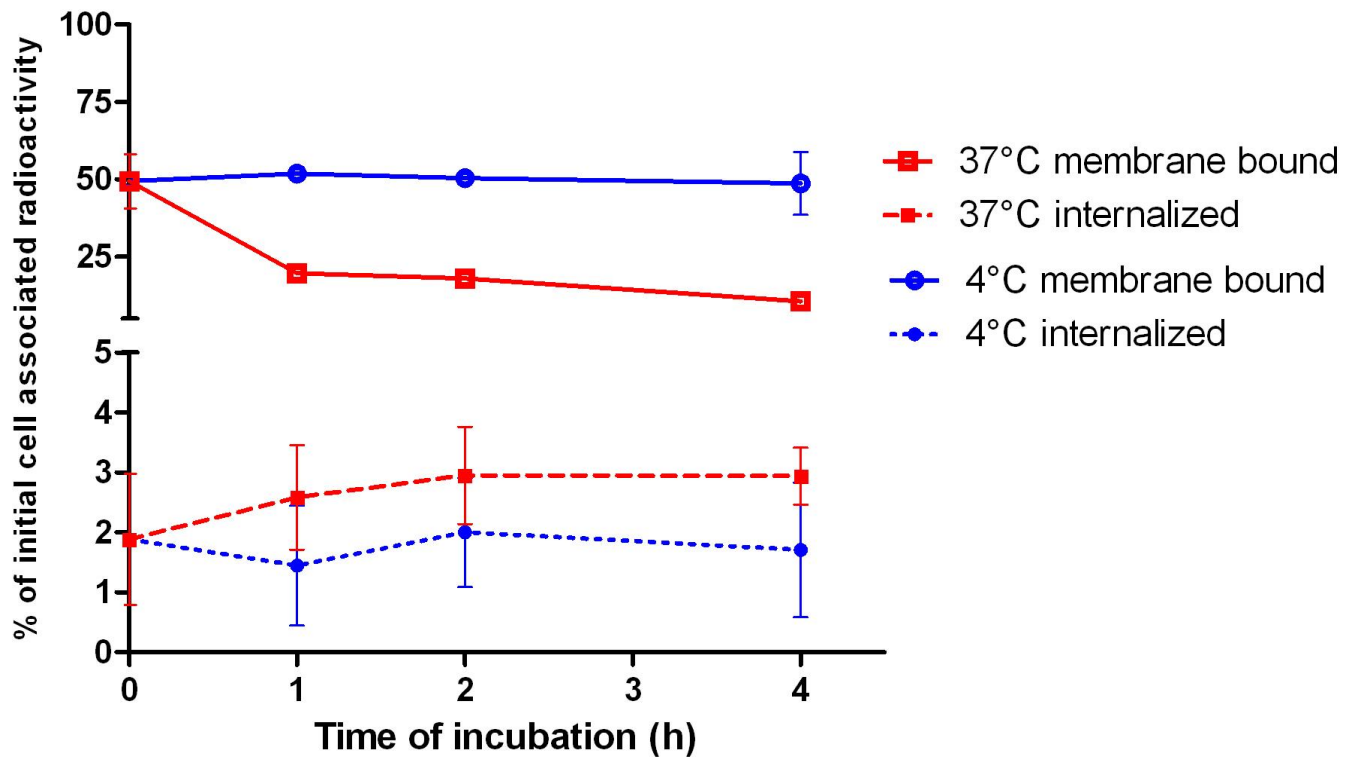

**SUPPLEMENTAL FIGURE 3.** Membrane binding and internalization of  $^{89}\text{Zr}$ -AMG 110 after binding EpCAM on HT-29 cells. Membrane bound and internalized fraction is expressed as percentage of initial cell associated radioactivity. Data is presented as mean  $\pm$  SD. At several time points in the graphs of membrane bound  $^{89}\text{Zr}$ -AMG 110, SD is not visible due its small size.

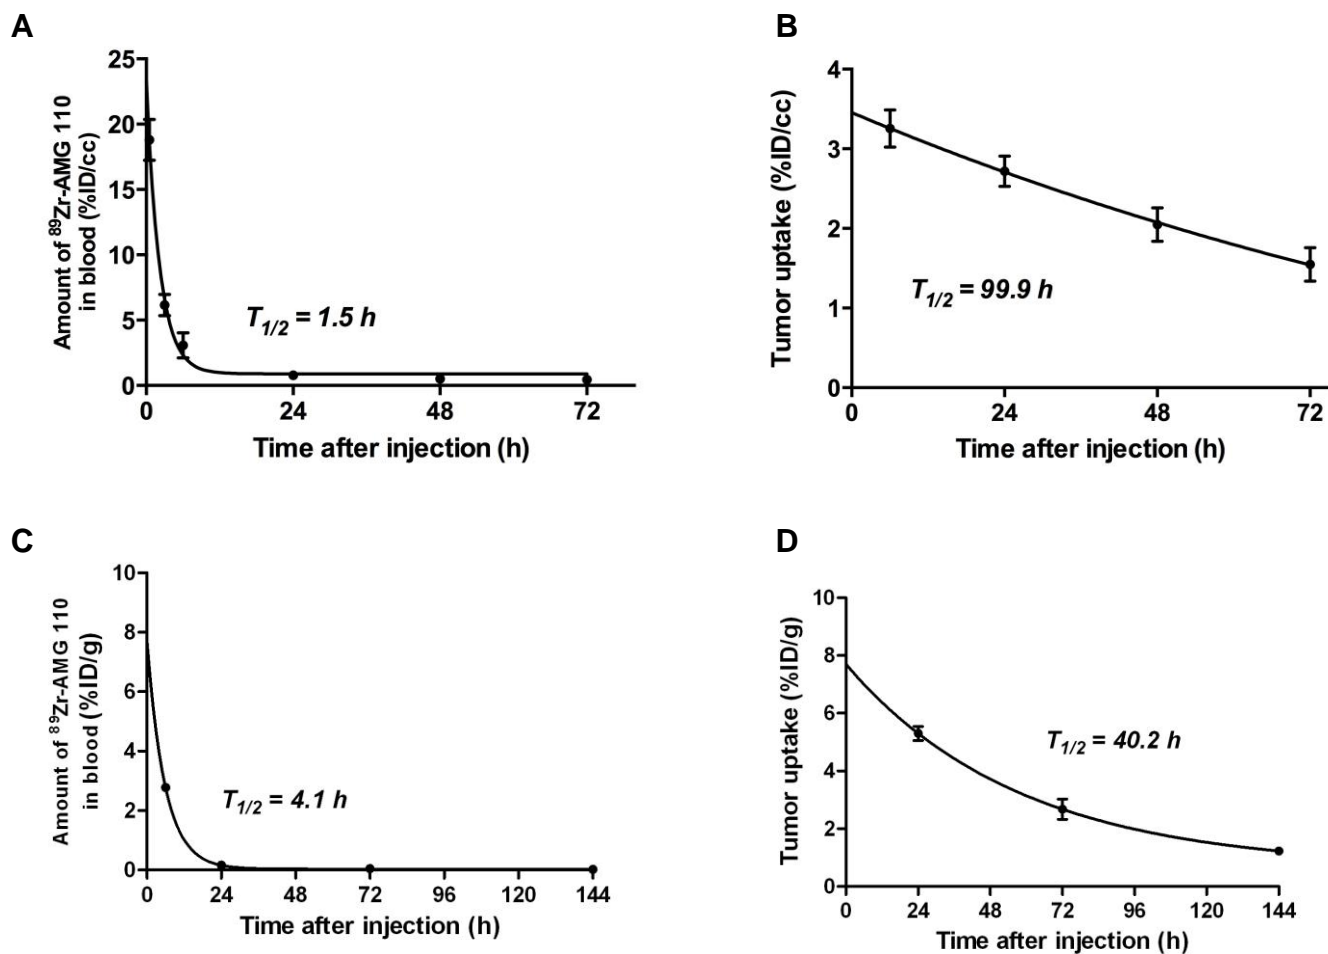

**SUPPLEMENTAL FIGURE 4.** Biological half-life of  $^{89}\text{Zr}$ -AMG 110 in blood and tumor.

Biological half-life of  $20 \mu\text{g}$   $^{89}\text{Zr}$ -AMG 110 in blood (A) and tumor (B), based on %ID/cc.

Biological half-life of  $40 \mu\text{g}$   $^{89}\text{Zr}$ -AMG 110 in blood (C) and tumor (D), based on %ID/g.

Data is presented as mean  $\pm$  SD.



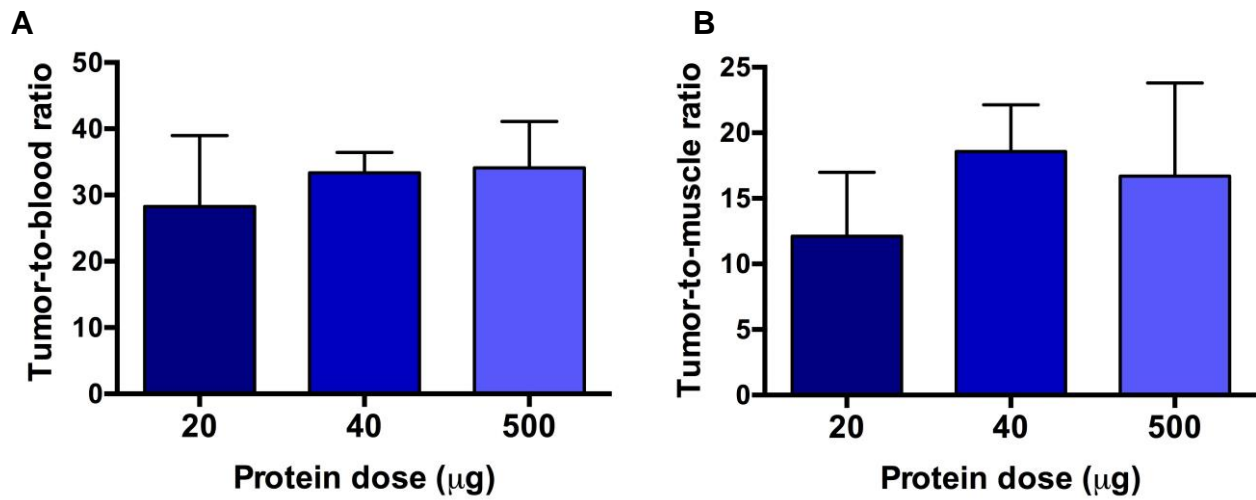

**SUPPLEMENTAL FIGURE 5.** Dose dependent tumor-to-blood (A) and tumor-to-muscle ratios (B). Mice were injected with 20 µg (n = 5), 40 µg (n = 4) or 500 µg (n = 3) protein doses. No significant differences were observed in blood or tissue levels between the dose groups. Data is presented as mean ± SD.

**A**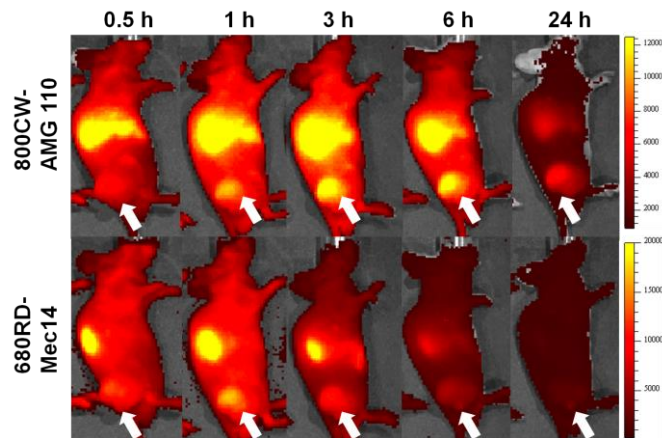**B**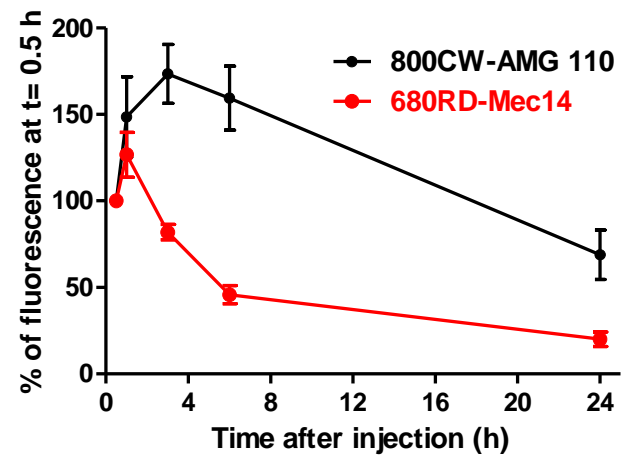

**SUPPLEMENTAL FIGURE 6.** Representative sagittal two-dimensional *in vivo* fluorescence images at indicated time points, after coinjection of 40  $\mu$ g 800CW-AMG 110 and 40  $\mu$ g 680RD-Mec14. White arrow indicates location of the tumor. (A). Fluorescent tracer uptake in HT-29 tumors over time, normalized to absolute fluorescence levels at 30 min after tracer injection (B). Data is presented as mean  $\pm$  SD.

## REFERENCES

1. Verel I, Visser GW, Boellaard R, Stigter-van Walsum M, Snow GB, van Dongen GA.  $^{89}\text{Zr}$  immuno-PET: Comprehensive procedures for the production of  $^{89}\text{Zr}$ -labeled monoclonal antibodies. *J Nucl Med.* 2003;44:1271-1281.
2. Terwisscha van Scheltinga AG, van Dam GM, Nagengast WB, et al. Intraoperative near-infrared fluorescence tumor imaging with vascular endothelial growth factor and human epidermal growth factor receptor 2 targeting antibodies. *J Nucl Med.* 2011;52:1778-1785.
3. Nagengast WB, de Vries EG, Hospers GA, et al. In vivo VEGF imaging with radiolabeled bevacizumab in a human ovarian tumor xenograft. *J Nucl Med.* 2007;48:1313-1319.
4. Lindmo T, Boven E, Cuttitta F, Fedorko J, Bunn PA. Determination of the immunoreactive fraction of radiolabeled monoclonal antibodies by linear extrapolation to binding at infinite antigen excess. *J Immunol Methods.* 1984;72:77-89.
5. Oude Munnink TH, de Vries EG, Vedelaar SR, et al. Lapatinib and 17AAG reduce  $^{89}\text{Zr}$ -trastuzumab-F(ab')<sub>2</sub> uptake in SKBR3 tumor xenografts. *Mol Pharm.* 2012;9:2995-3002.
